# Supplementary material for: A Correlate of HIV-1 Control Consisting of Both Innate and Adaptive Immune Parameters Best Predicts Viral Load by Multivariable Analysis in HIV-1 Infected Viremic Controllers and Chronically-Infected Non-Controllers
Source: PLoS One. 2014 Jul 31;9(7):e103209. doi: 10.1371/journal.pone.0103209 (PMC4117509; doi:10.1371/journal.pone.0103209)
Supplement: File S1 — (XLS) [file pone.0103209.s001.xls]

## Sheet: Sheet1
Patient ID	% CD4	% CD8	CD8 activation	% PDC	PDC activation	% NK	NK CD16 MFI	Gag/Pol Ratio	Pol-specific CD8	Spontaneous CD107	Induced CD107	IFN-gamma	TNF-alpha	Viral Load	Group
E-001	18.1	34.9	25.7	0.076	18.1	2.59	1468							4.341	Non-controller
E-003	21.9	47.9	23.6	0.272	14.6	10.5	6028							3.08	Viremic Controller
E-004	21.2	62.3	30.85			1.33	5436	1.1	1	7.34	13.72	4.19	0	3.01	Viremic Controller
E-005	33.7	44.4	10.8			4.37	7274	5.25	0.4	1.6	17.47	1.63	0	1.92	Viremic Controller
E-006	15.8	67	39.3	0.1225	18.1	1.68	3770							4.43	Non-controller
E-008	30.2	55.1	18	0.058	0.3	1.71	8616							3.876	Non-controller
E-009	35.5	38.5	25.64	0.047	61.8	0.84	595							3.89	Non-controller
E-011	24.1	44.4	21.8	0.189	9.3	8.94	3367							3.79	Non-controller
E-012	30.2	37.6	5.85	0.334	14.8	10	7702							2	Viremic Controller
E-013	29.7	36	12.25	0.0629	9.5	4.51	5623							1.8	Viremic Controller
E-014	34.9	43.6	10.2	0.2	8.4	3.51	4326							2.665	Viremic Controller
E-015	15	57.6	25.7	0.0644	0	3.98	2994	5.111	0.9	1.81	15.24	1.78	0.17	2.85	Viremic Controller
E-016	20	33.9	29.9	0.151	5.6	16.8	596	1.8333	0.6					3.6	Non-controller
E-017	31.5	35.7	28.5	0.145	0	14.4	13832	4.36364	1.1	1.55	21.38	5.43	0.34	3.2	Viremic Controller
E-019	37.4	32.9	18.6			2.57	3667	0.5	1	8	17.47	5.06	2.83	3.33	Non-controller
E-021	18.8	47.4	8.7	0.10073	8.7	4.4	3664	1	0.03	2.12	13.88	0	0.61	2.62	Viremic Controller
E-022	35.3	39.1	11.1	0.2256	10.5	14.2	4462	2.5	0.4	3.325	19.95	3.84	0	2.86	Viremic Controller
E-023	22.2	31.1	17.5	0.0833	1.7		1026	0.416667	1.2		9.28	1.291	0.257	3.32	Non-controller
E-024	14	53.3	18.1	0.0266	0	0.64	1865	0.142857	0.7	8.83	8.9	0	0	3.95	Non-controller
E-027	25.2	41.2	14.8	0.201	22.8	12.7	13776	5.333	0.6	1.62	5.56	3	0.05	2.2	Viremic Controller
E-028	36.1	26.6	13.4	0.233	12.9	19.6	6858	1.5	0.8	1.39	12.85	0.43	0.56	2.15	Viremic Controller
E-029	30.1	58.1	42	0.02346	0	2.4	12657	1.666	0.9	4.87	5.34	0	1.54	3.2	Viremic Controller
E-031	34.8	44.7	5.15	0.0612	0	10.4	579	1.2	0.5					3.13	Viremic Controller
E-032	22.4	45	18.4	0.019992	53.8	13.6	1474	0.5	1.2	0.81	12.03	0.93	0	4.06	Non-controller
E-033	24.6	49	20	0.1994	8	3.05	4154	1.05	2	1.37	10.98	0.95	0.23	3.759	Non-controller
V-001	24.5	51.1	30.8	0.085	39	2.59	3494	0.0682	4.4	2.9	16.88	0.16	1.77	4.46	Non-controller
V-002	24.8	51.5	11.45	0.039	38.9	3.64	3985	0.46666	1.5	5.17	27.44	1.861	2.24	3.984	Non-controller
V-004	26.1	41.9	15	0.08295	42.4	5.47	4687	0.64706	1.8	1.92	18.69	2.12	1.51	4.71	Non-controller
V-005	15.4	70.9	12.5	0.023545	0	2.21	2222	2	1.1					4.64	Non-controller
V-006	20.5	56.1	26	0.06157	14.1	5.27	1132	0.3846	1.3					4.62	Non-controller
V-007	26.8	55.6		0.02864	18.5	2	2109	1.25	1.2	4.95	4.03	0.702	1.34	5.03	Non-controller
